# Supplementary material for: Anti-hyperalgesic effects of calcitonin on neuropathic pain interacting with its peripheral receptors
Source: PubMed Central journal article supplement (PMC3517395; doi:10.1186/1744-8069-8-42), 2012-06-07
Supplement: 1744-8069-8-42-S1.pdf [file 1744-8069-8-42-S1.pdf]

### Delta Rn vs Cycle

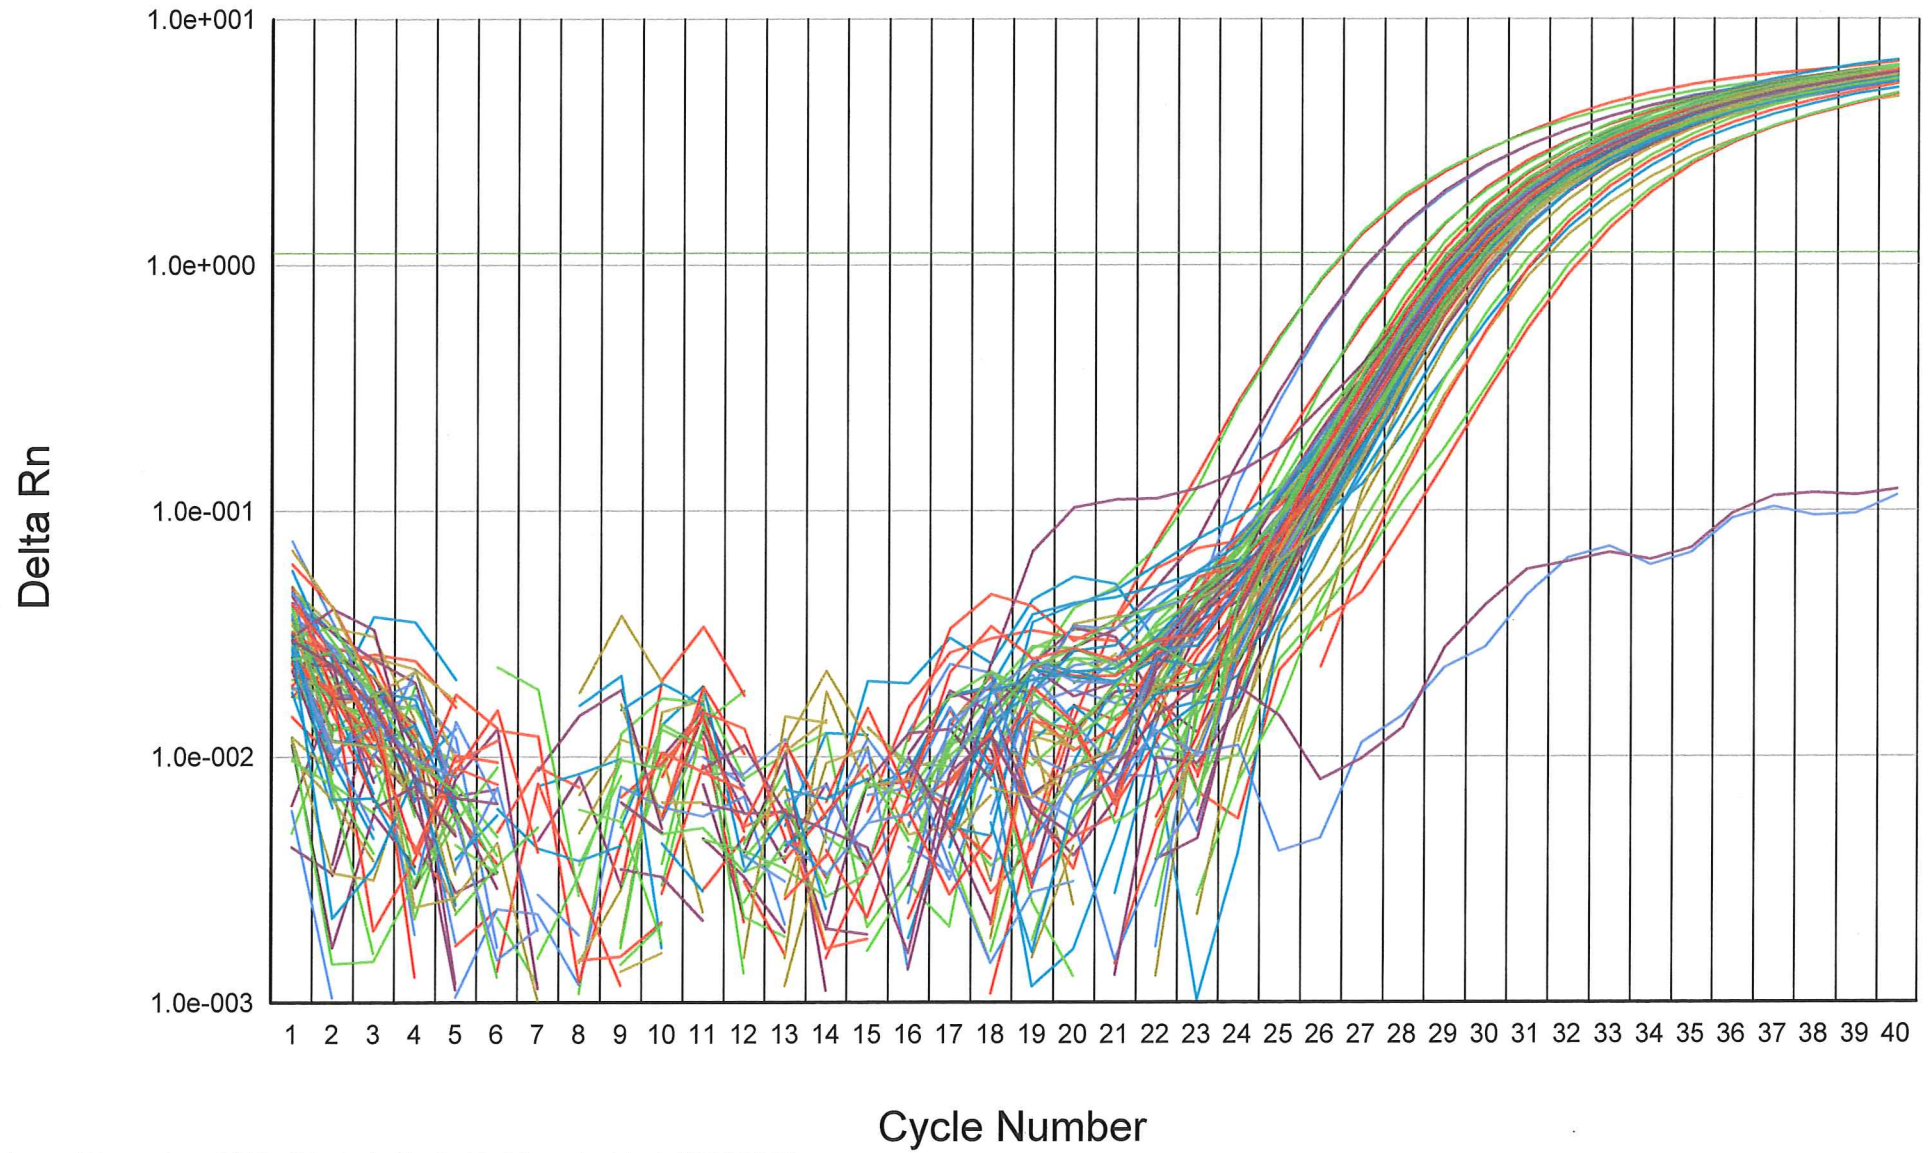

Selected Detector: SNS; Start: 4; End: 16; Threshold: 1.12004602

Well(s): A1-H12

Document: 040507SNS (Absolute Quantification)
