# Supplementary material for: Anti-hyperalgesic effects of calcitonin on neuropathic pain interacting with its peripheral receptors
Source: PubMed Central journal article supplement (PMC3517395; doi:10.1186/1744-8069-8-42), 2012-06-07
Supplement: 1744-8069-8-42-S2.pdf [file 1744-8069-8-42-S2.pdf]

### Standard Curve

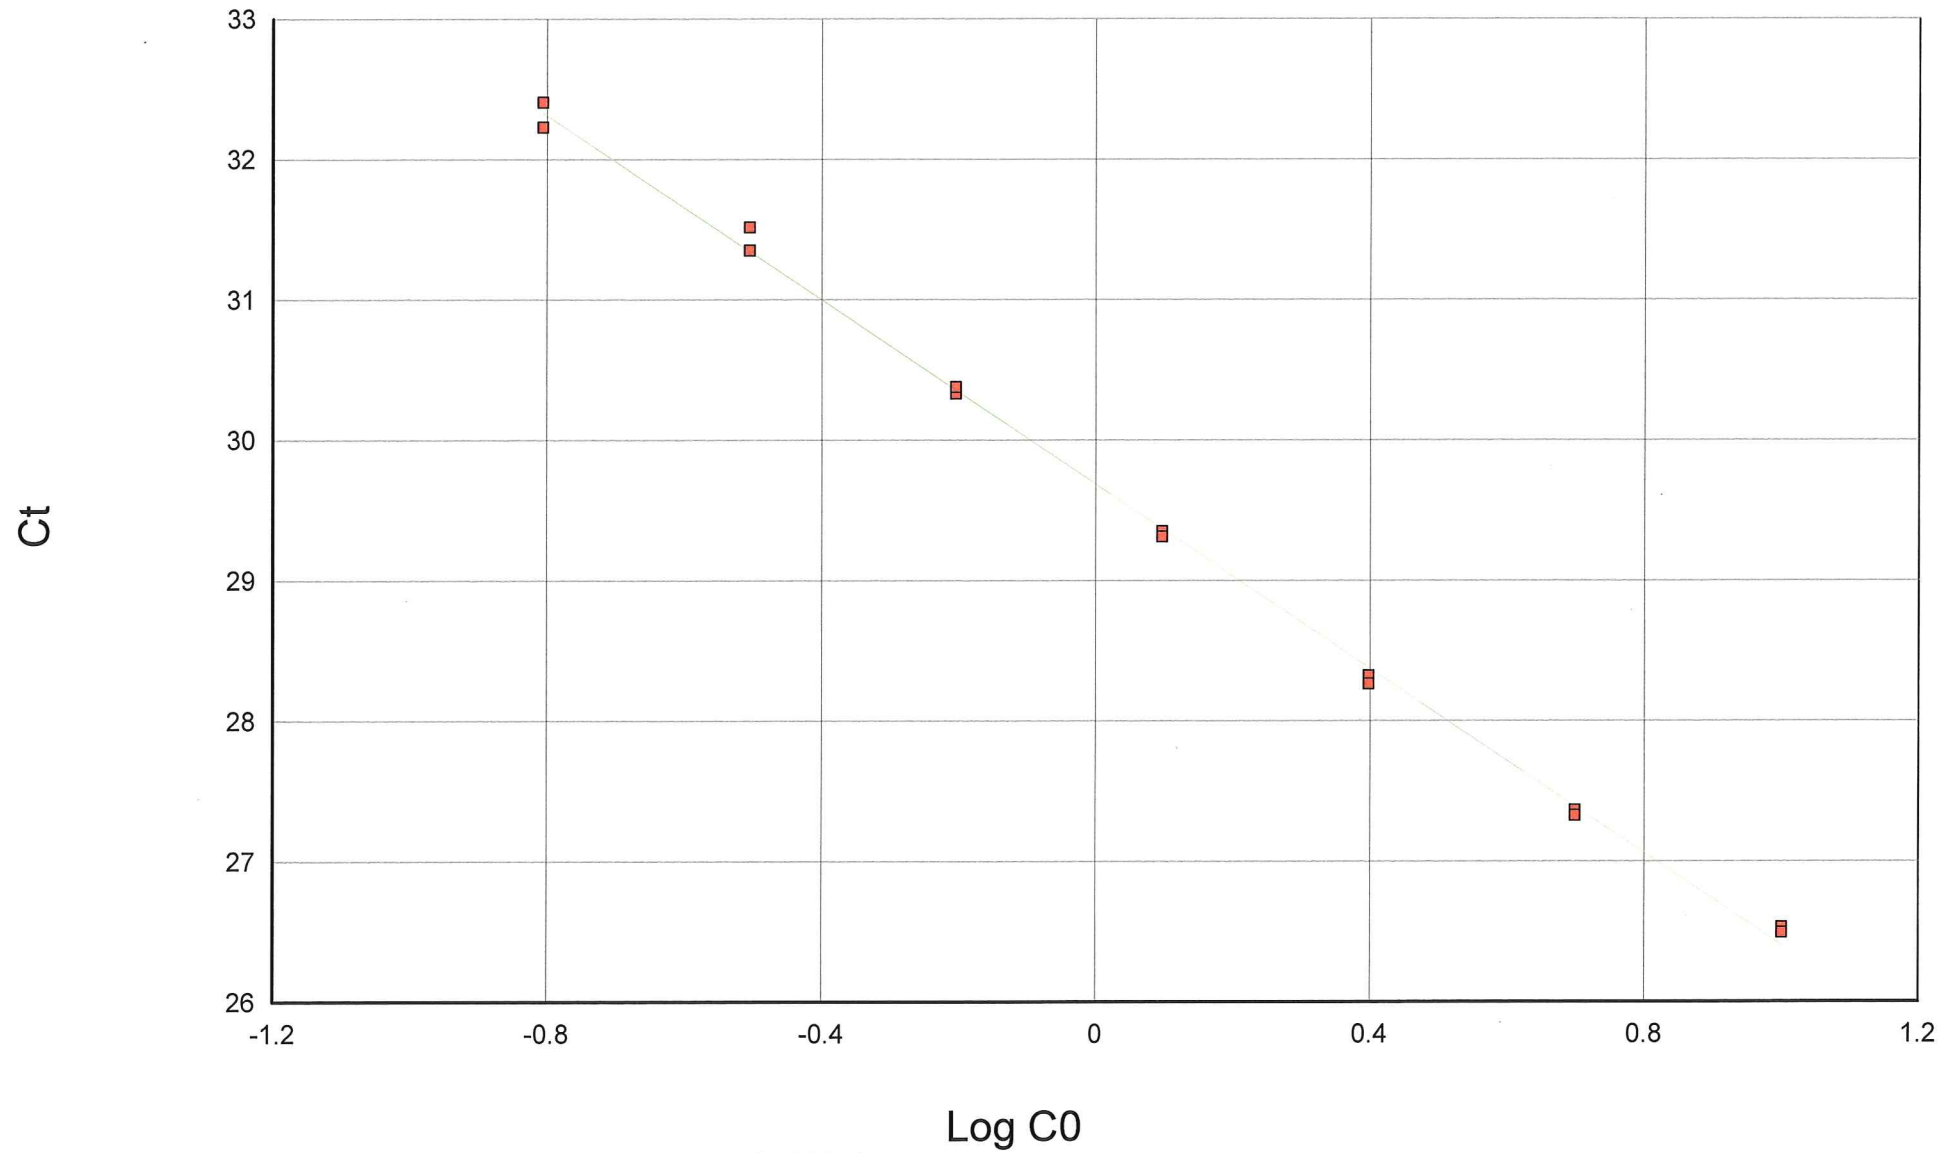

Detector: SNS, Slope: -3.281060, Intercept: 29.687355, R2: 0.998253  
Document: 040507SNS (Absolute Quantification)
