# Supplementary material for: Anti-hyperalgesic effects of calcitonin on neuropathic pain interacting with its peripheral receptors
Source: PubMed Central journal article supplement (PMC3517395; doi:10.1186/1744-8069-8-42), 2012-06-07
Supplement: 1744-8069-8-42-S3.pdf [file 1744-8069-8-42-S3.pdf]

### Delta Rn vs Cycle

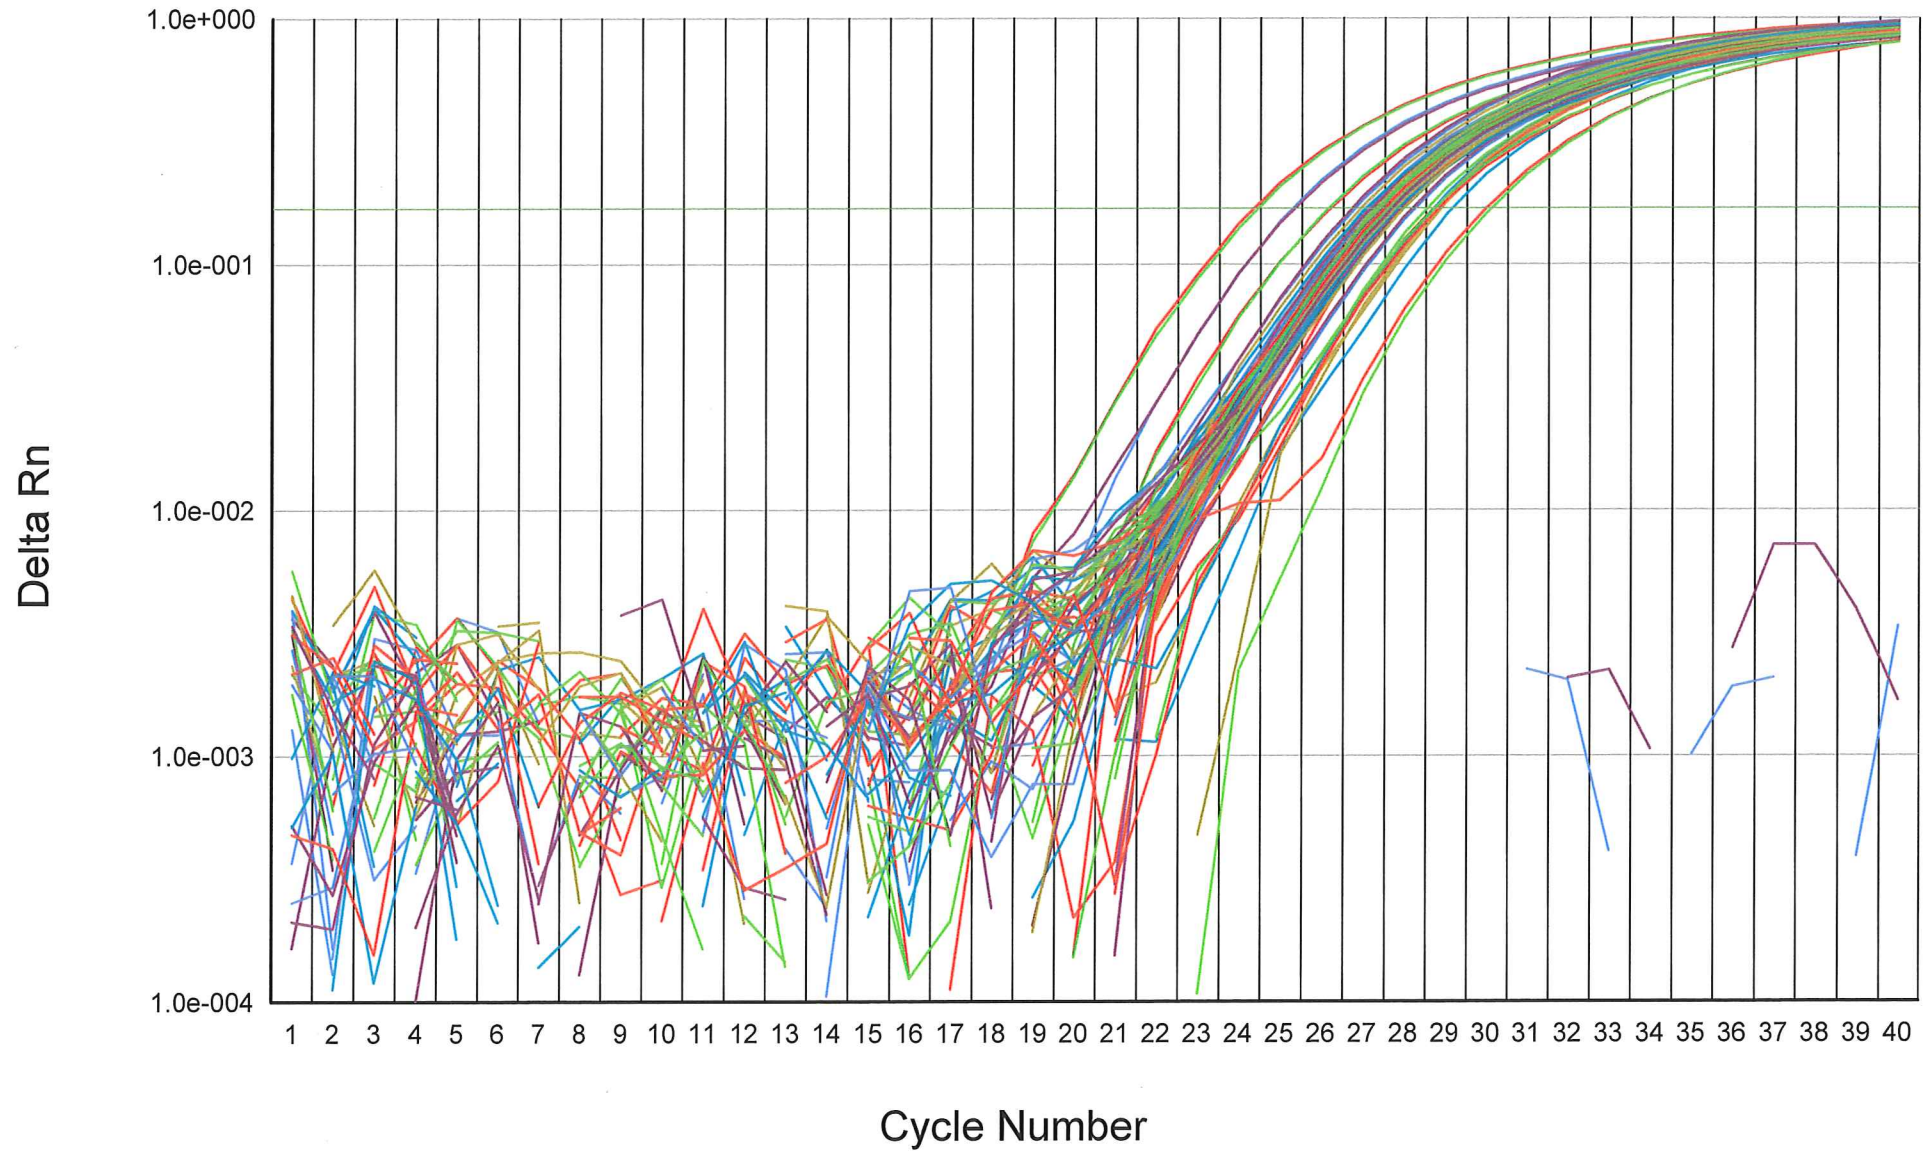

Selected Detector: GAPDH; Start: 1; End: 16; Threshold: 0.16885100  
Well(s): A1-H12  
Document: 040506gapdh (Absolute Quantification)
