# Supplementary material for: Anti-hyperalgesic effects of calcitonin on neuropathic pain interacting with its peripheral receptors
Source: PubMed Central journal article supplement (PMC3517395; doi:10.1186/1744-8069-8-42), 2012-06-07
Supplement: 1744-8069-8-42-S4.pdf [file 1744-8069-8-42-S4.pdf]

### Standard Curve

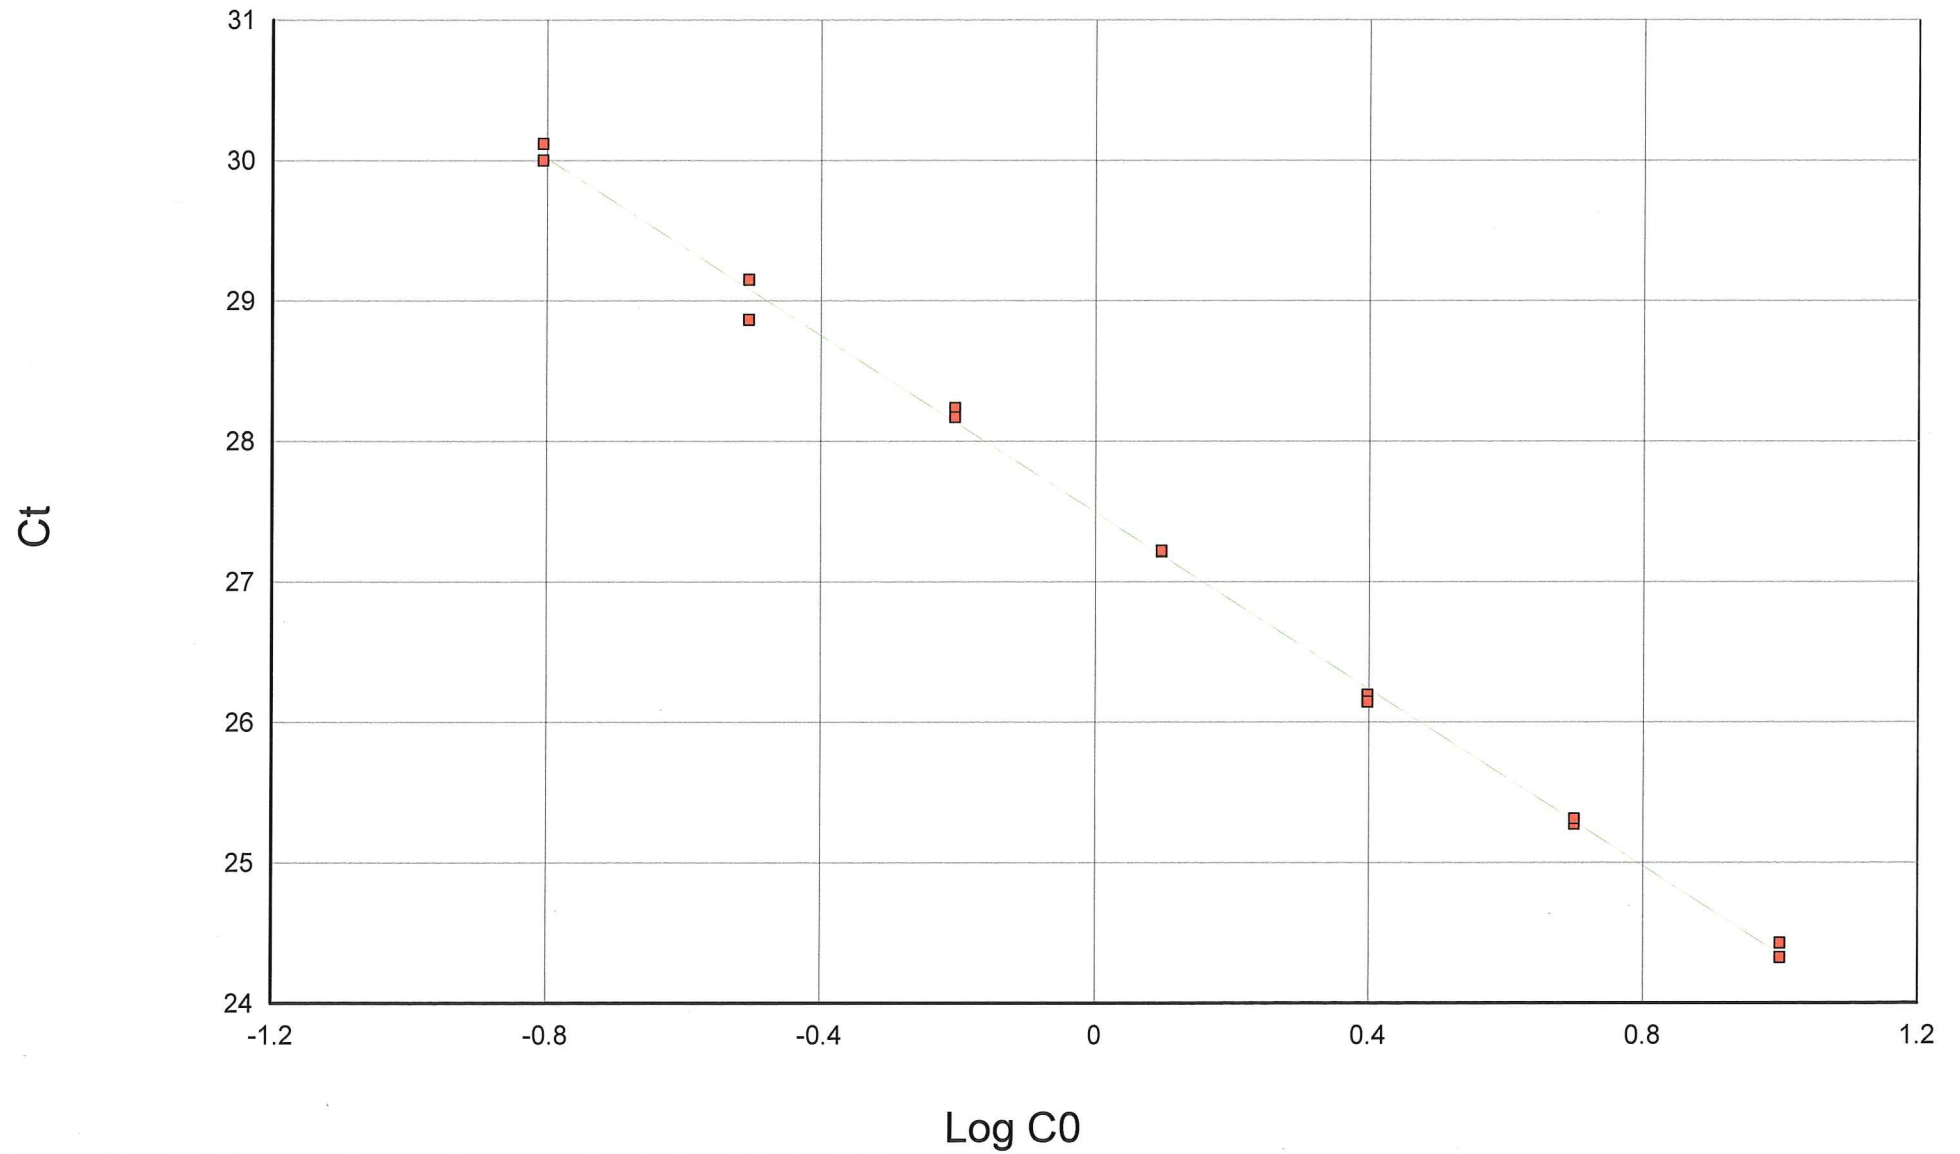

Detector: GAPDH, Slope: -3.145884, Intercept: 27.494377, R2: 0.998165  
Document: 040506gapdh (Absolute Quantification)
